# Supplementary material for: High-efficiency quantum dot light-emitting diodes based on Li-doped TiO2 nanoparticles as an alternative electron transport layer
Source: Royal Society of Chemistry journal article supplement (doi:10.1039/d0nr05920j), 2021-01-01
Supplement: d0nr05920j1.pdf [file d0nr05920j1.pdf]

## **High-efficiency quantum dot light-emitting diodes based on Li-doped TiO<sub>2</sub> nanoparticles as an alternative electron transport layer**

Moonbon Kim,<sup>a</sup> Nayeon Lee,<sup>b</sup> Joong Hwan Yang,<sup>b</sup> Chang Wook Han,<sup>b</sup> Hyun-Min Kim,<sup>c</sup>

Wooje Han,<sup>d</sup> Hyung-Ho Park,<sup>d</sup> Heesun Yang,<sup>\*c</sup> and Jiwan Kim<sup>\*a</sup>

<sup>a</sup>Department of Advanced Materials Engineering, Kyonggi University, Suwon 16227, Republic of Korea

<sup>b</sup>Foundation Technology Laboratory, LG Display Co. Ltd., Seoul 07796, Republic of Korea

<sup>c</sup>Department of Materials Science and Engineering, Hongik University, Seoul 04066, Republic of Korea

<sup>d</sup>Department of Materials Science and Engineering, Yonsei University, Seoul 03722, Republic of Korea

### ***Synthesis of pristine and Li-doped TiO<sub>2</sub> nanoparticles***

In a typical reaction of colloidal TiO<sub>2</sub> nanoparticles (NPs), 3 ml (10 mmol) of titanium iso-propoxide, 5 ml of oleylamine and 0.5 mmol of lithium hydroxide monohydrate (only for Li-doping) were dissolved in 15 ml isopropyl alcohol (IPA) solvent. The solution was stirred a few minutes and then mixed with 100 ml of IPA and distilled water solution. After stirred for 1 h at 100 °C, the TiO<sub>2</sub> NPs were collected via centrifugation of the solution at 13000 rpm. Finally, the collected TiO<sub>2</sub> NPs were redispersed in ethanol solvent and filtered to remove of impurity.

### ***Synthesis of green, red, and blue quantum dots (QDs)***

For a typical synthesis of green CdZnSeS/ZnS QDs, 0.14 mmol of Cd oxide and 3.41 mmol of Zn oxide were placed with 7 mL of oleic acid (OA) in a three-neck flask and heated to 150°C with N<sub>2</sub> flowing. Then, 15 mL of 1-octadecene (ODE) was added and heated to 310°C. Subsequently, a Se+S stock solution (2.2 mmol of Se and 2.2 mmol of S dissolved in 2.2 mL of trioctylphosphine (TOP)) was swiftly injected to the mixture, and the reaction of composition-gradient CdZnSeS core was carried out at 310°C for 10 min. 1.6 mmol of S dissolved in 2.4 mL of ODE was introduced into the reactor and the reaction was maintained for 12 min. For a successive ZnS shelling, 2.86 mmol of Zn acetate dihydrate dissolved in 1 mL of OA and 4 mL of ODE was rapidly put to the above reactor and the reaction was held at 270 °C for 10 min. Then, 9.65 mmol of S dissolved in 5 mL was dropwisely added, followed by the ZnS reaction at that temperature for 20 min. For a synthesis of red CdZnSe/ZnS QDs, 0.6 mmol of Cd oxide and 1.2 mmol of Zn acetate were mixed with 3 mL of OA and 15 mL of ODE in a three-neck flask. The temperature of the mixture was elevated to 300°C with N<sub>2</sub> pursing. At that temperature, CdZnSe cores were synthesized by injecting a Se stock solution containing 1.2 mmol of Se in 0.1 mL of TOP, followed by the core growth for 2 min 30 s. Then, for consecutively forming ZnS shell on the CdZnSe cores, 0.18 mL of 1-dodecanethiol was slowly added and the reaction was held for 20 min. A S stock solution including 1 mmol of S dissolved in 0.83 mL of TOP was additionally injected to the mixture and the reaction was maintained for 10 min, followed by an addition of 0.12 mL of 1-octanethiol. For a typical synthesis of blue CdZnS/ZnS QDs, 1 mmol of Cd oxide and 10 mmol of Zn oxide with 7 mL of OA was prepared in a reactor and heated to 150 °C with N<sub>2</sub> flowing. 15 mL of ODE was introduced to the reactor and heated to 310 °C. The nucleation and growth of CdZnS cores were held by injecting a S-ODE solution including 1.6 mmol of S dissolved in 2.4 mL of ODE at

that temperature and maintaining the reaction for 12 min. A successive ZnS shelling was carried out by dropwisely adding a S-OA solution prepared by dissolving 8 mmol of S in 5 mL of OA to the above mixture. The shelling reaction was maintained at 310 °C for 8 h. The resulting green CdZnSeS/ZnS, red CdZnSe/ZnS, and blue CdZnS/ZnS QDs were repeatedly purified by centrifugation with a solvent/nonsolvent combination. Then, the purified QDs were redispersed in hexane for characterizations and formation of the emitting layer (EML).

### ***Fabrication of quantum dot light-emitting diodes (QLEDs)***

The inverted QLEDs were fabricated on indium-tin-oxide (ITO) coated glass substrates. The substrates were sequentially cleaned with isopropyl alcohol and then rinsed with deionized water. After the patterned ITO substrates were treated in ultraviolet-ozone for 15 minutes. Pristine or Li-doped TiO<sub>2</sub> NPs were deposited on ITO substrates by spin-casting at a spin-rate of 1000 rpm for 60 seconds. For the fabrication of EML, QDs dispersion was spin-cast on top of ITO/pristine or Li-doped TiO<sub>2</sub> NPs substrates at a spin-rate of 2000 rpm for 25 seconds. The organic materials and metals were deposited in continuance by thermal evaporation without breaking vacuum. 4,4'-bis (carbazol-9-yl) biphenyl (CBP) for hole transport layer, MoO<sub>3</sub>, and Al were thermally evaporated with a deposition rate of  $\sim 1 \text{ \AA/s}$  for CBP,  $\sim 0.5 \text{ \AA/s}$  for MoO<sub>3</sub>, and,  $\sim 3 \text{ \AA/s}$  for Al electrode.

### ***Characterization***

The current density-voltage-luminance (J-V-L) characteristics of the devices were measured by using a spectroradiometer (CS2000, Konica Minolta) with Keithley 2400 source meter under ambient conditions. From these J-V-L measurements, the changes in the

luminance and current efficiency of the devices as a function of the applied voltage were studied systematically. The average diameter of TiO<sub>2</sub> NPs was measured by the dynamic light scattering method (Zetasizer Nano ZS, Malvin). The high-resolution transmission electron microscopy was used to measure the particle size of TiO<sub>2</sub> NPs (JEM-2100F, JEOL). The crystal phase of pristine and Li-doped TiO<sub>2</sub> NPs was analyzed using X-ray diffractometer (MiniFlex2, Rigaku). X-ray photoelectron spectroscopy (XPS) (Thermo VG) with Al K $\alpha$  x-ray (E=1486.6 eV) was used to analyze the actual chemical composition of Li-doped TiO<sub>2</sub> NPs. The surface roughness was measured by atomic force microscopy (XE-100, PSIA). The electronic structures of pristine and Li-doped TiO<sub>2</sub> NPs were investigated by ultraviolet photoelectron spectroscopy (ESCALAB 250, Thermo Scientific). The lifetime result of the QLEDs was obtained using a multi-channel lifetime test system with an embedded photodiode. (M6000 Plus, McScience).

**Table S1** Performance of QLEDs with various TiO<sub>2</sub> NPs.

| ETL                             | Max. luminance<br>(cd/m <sup>2</sup> ) | Max. current<br>efficiency<br>(cd/A) | Max. EQE<br>(%) |
|---------------------------------|----------------------------------------|--------------------------------------|-----------------|
| TiO <sub>2</sub>                | 149,479 (@9.5 V)                       | 32.07 (@8 V)                         | 7.93 (@8 V)     |
| Li-doped TiO <sub>2</sub> (3%)  | 159,840 (@9.5 V)                       | 36.45 (@8 V)                         | 9.12 (@8 V)     |
| Li-doped TiO <sub>2</sub> (5%)  | 169,790 (@9.5 V)                       | 40.97 (@8 V)                         | 10.27 (@8 V)    |
| Li-doped TiO <sub>2</sub> (7%)  | 143,703 (@9.5 V)                       | 31.79 (@8 V)                         | 7.98 (@8 V)     |
| Li-doped TiO <sub>2</sub> (10%) | 157,103 (@10.5 V)                      | 34.97 (@8 V)                         | 8.86 (@8 V)     |

**Table S2** Energy levels of ETL with different Li doping concentrations.

| ETL                             | Valence band onset<br>(eV) | VBM<br>(eV) | Bandgap<br>(eV) | CBM<br>(eV) |
|---------------------------------|----------------------------|-------------|-----------------|-------------|
| TiO <sub>2</sub>                | 4.01                       | 7.95        | 4.08            | 3.87        |
| Li-doped TiO <sub>2</sub> (5%)  | 4.08                       | 7.70        | 4.17            | 3.53        |
| Li-doped TiO <sub>2</sub> (10%) | 4.13                       | 7.47        | 4.25            | 3.22        |

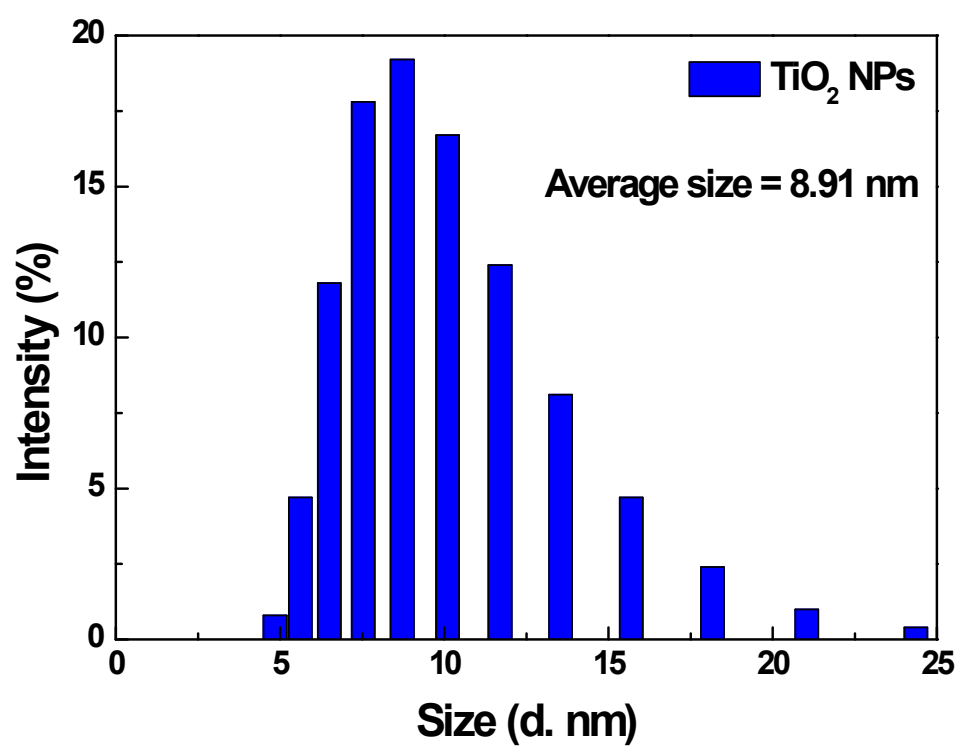

**Fig. S1** Particle size distribution of  $\text{TiO}_2$  nanoparticles by dynamic light scattering method.

(a)

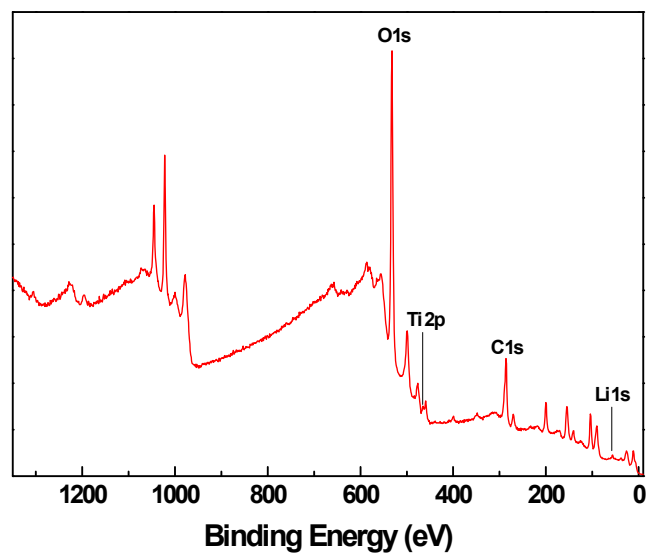

(b)

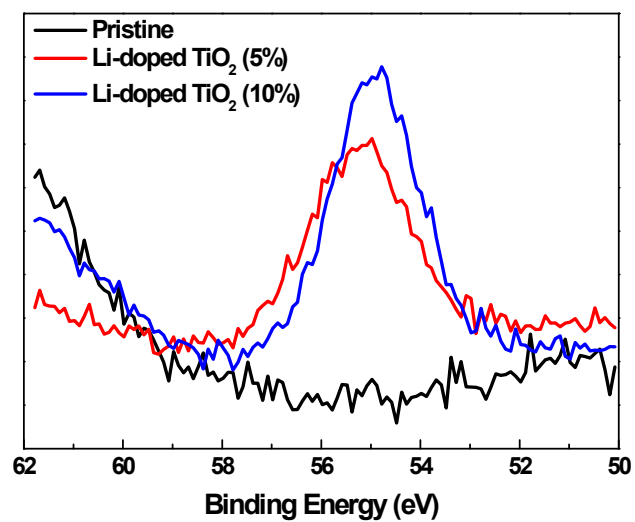

(c)

|           | TiO <sub>2</sub> | 5% Li-doped TiO <sub>2</sub> | 10% Li-doped TiO <sub>2</sub> |
|-----------|------------------|------------------------------|-------------------------------|
| <b>Ti</b> | 15.26            | 17.13                        | 17.26                         |
| <b>O</b>  | 42.45            | 41.95                        | 43.15                         |
| <b>Li</b> | -                | 4.51                         | 7.48                          |
| <b>C</b>  | 42.29            | 36.41                        | 32.11                         |

**Fig. S2** (a) Survey scan, (b) Li 1s spectra and (c) chemical composition of Li-doped TiO<sub>2</sub> NPs.

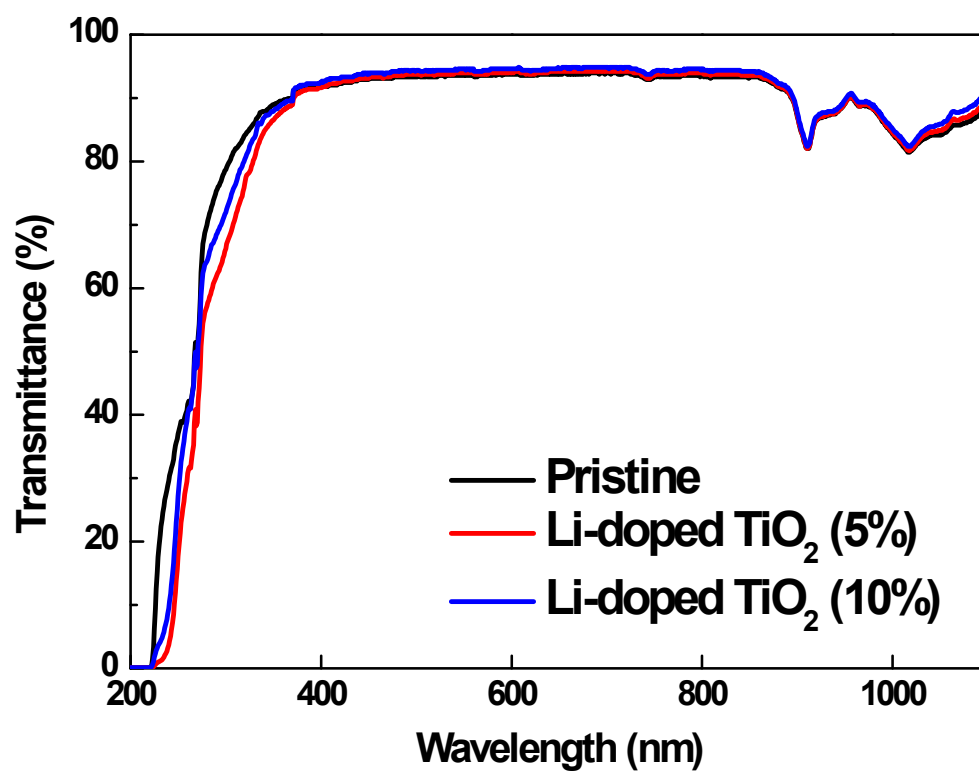

**Fig. S3** Optical transmittance from pristine, 5% and 10% Li-doped TiO<sub>2</sub> NPs.

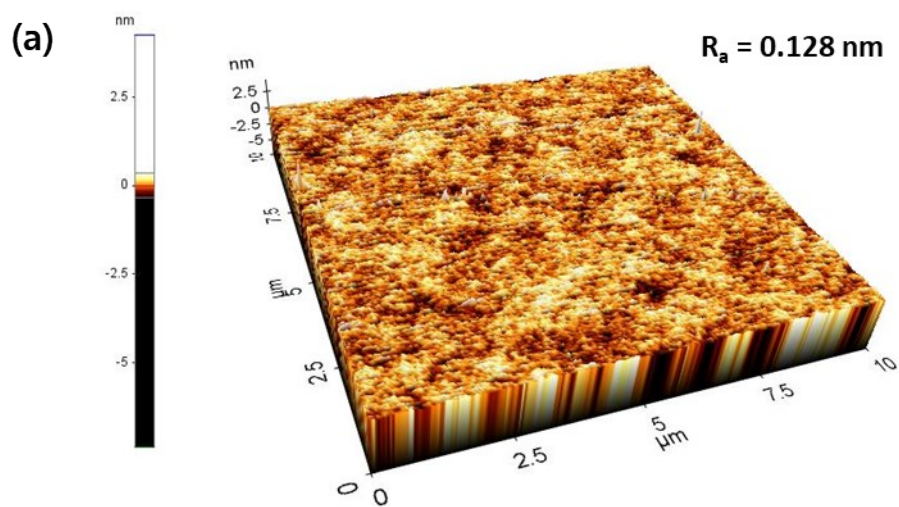

**Fig. S4** AFM images of (a) pristine and (b) 5% Li-doped TiO<sub>2</sub> NPs on ITO glass.

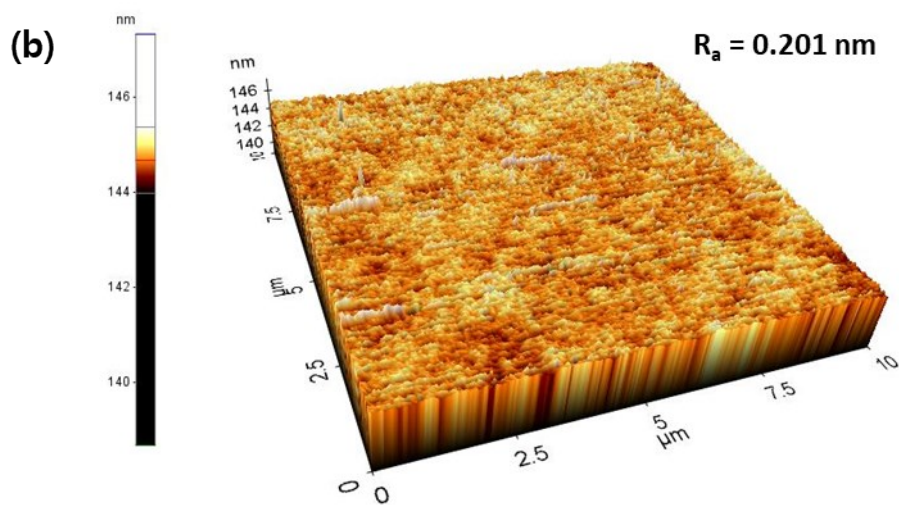

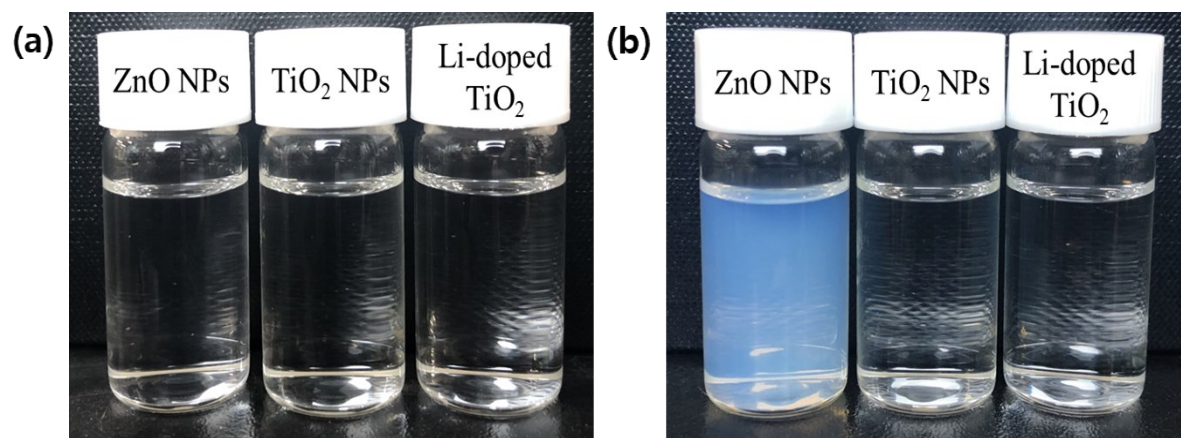

**Fig. S5** Observation of the aggregate formation from ZnO, TiO<sub>2</sub> and 5% Li-doped TiO<sub>2</sub> NPs in ethanol at room temperature: (a) As-redispersed and (b) after 2 days.

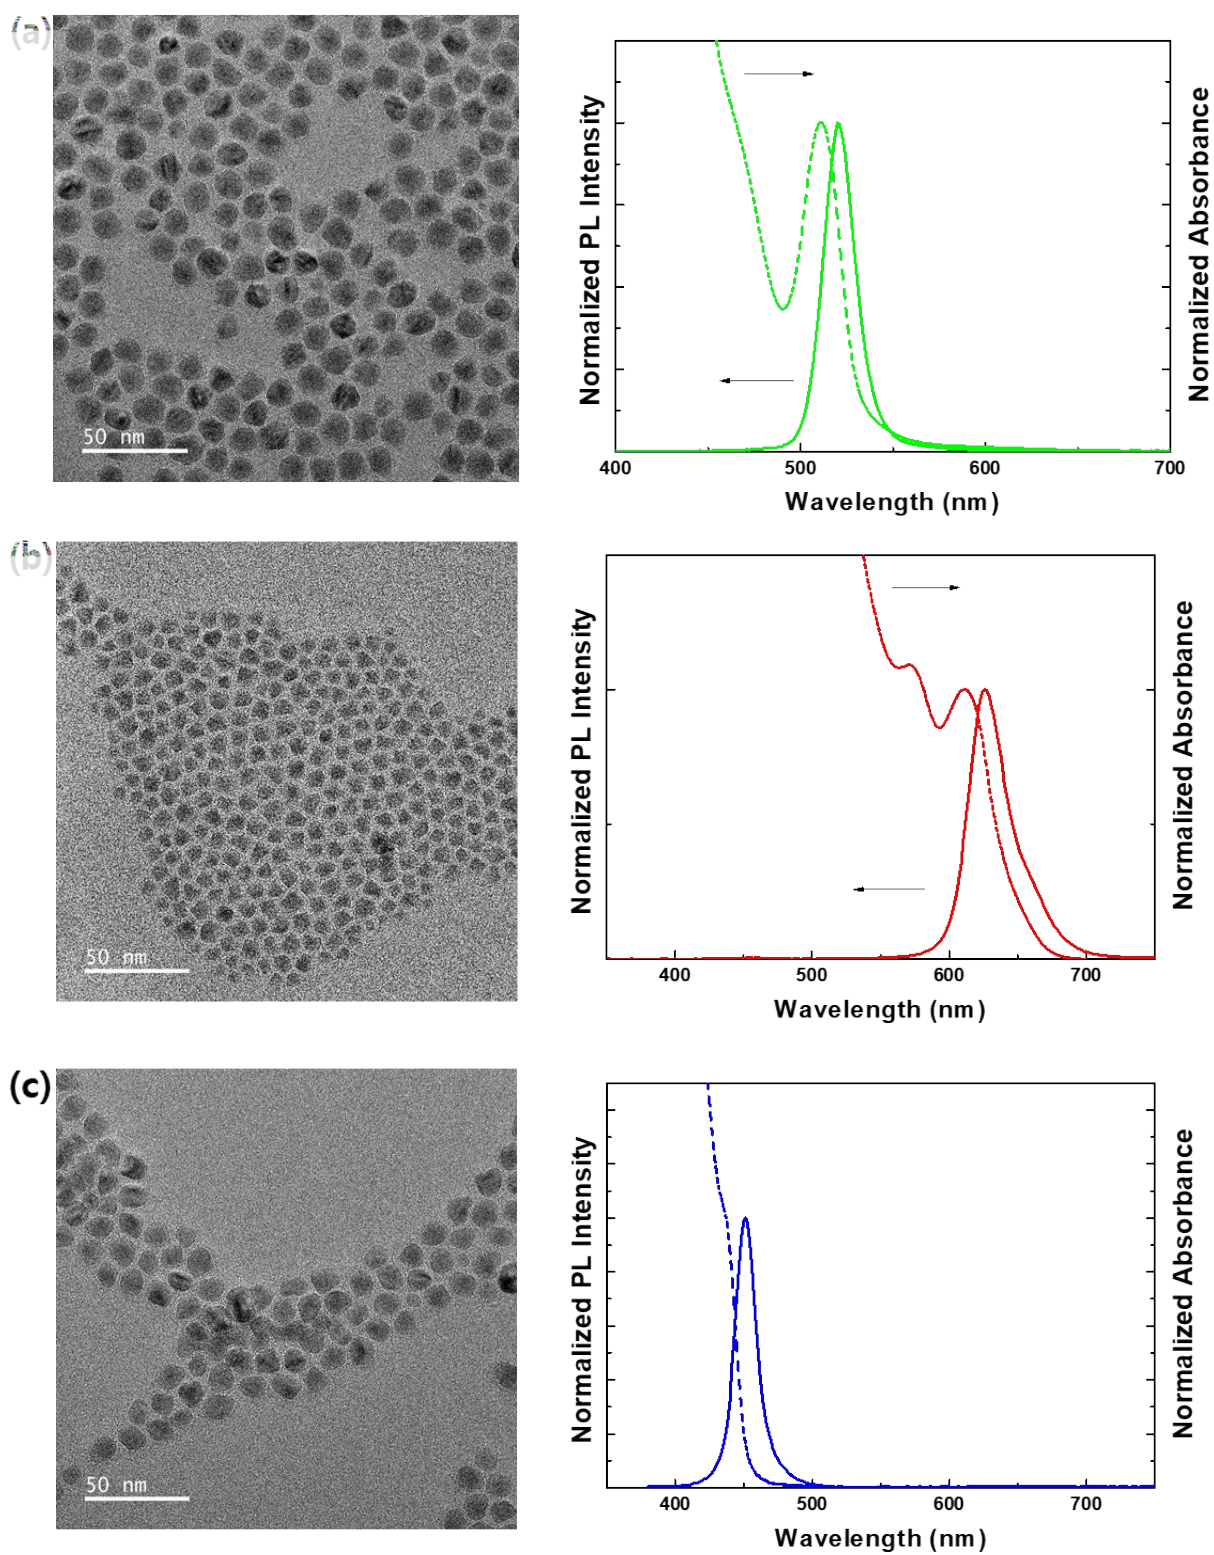

**Fig. S6** TEM images and absorption/PL spectra of (a) green, (b) red, and (c) blue QDs.

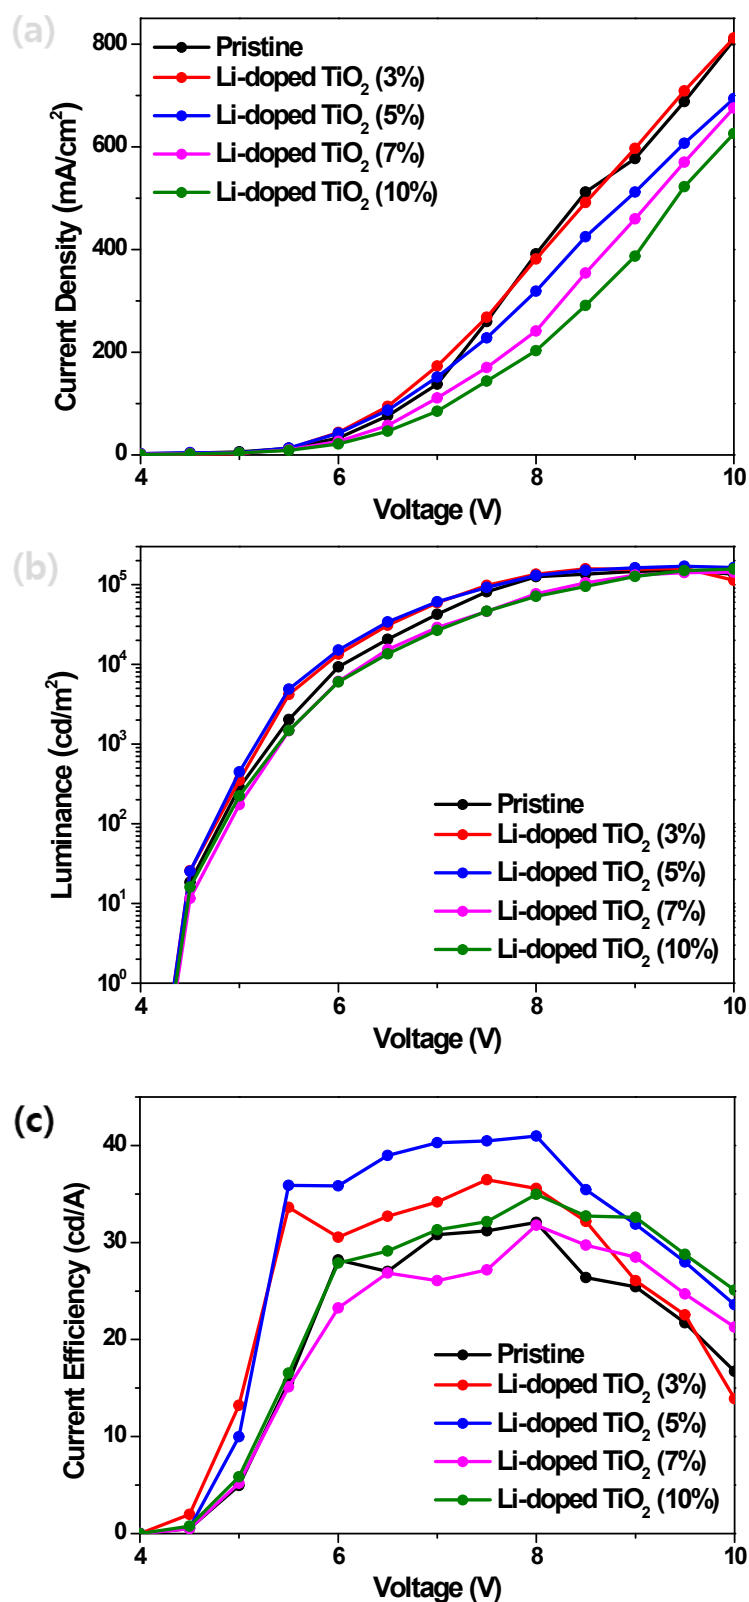

**Fig. S7** Voltage-dependent variations of (a) current density, (b) luminance, and (c) current efficiency of QLEDs with pristine or Li-doped TiO<sub>2</sub> NPs as the ETL.

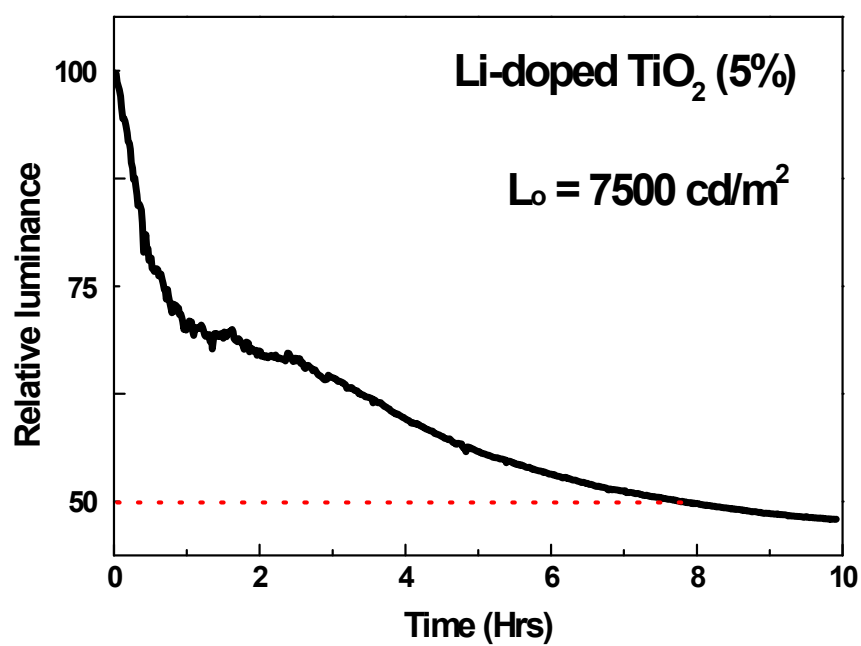

**Fig. S8** Lifetime measurement of QLEDs with 5% Li-doped TiO<sub>2</sub> NPs as the ETL.

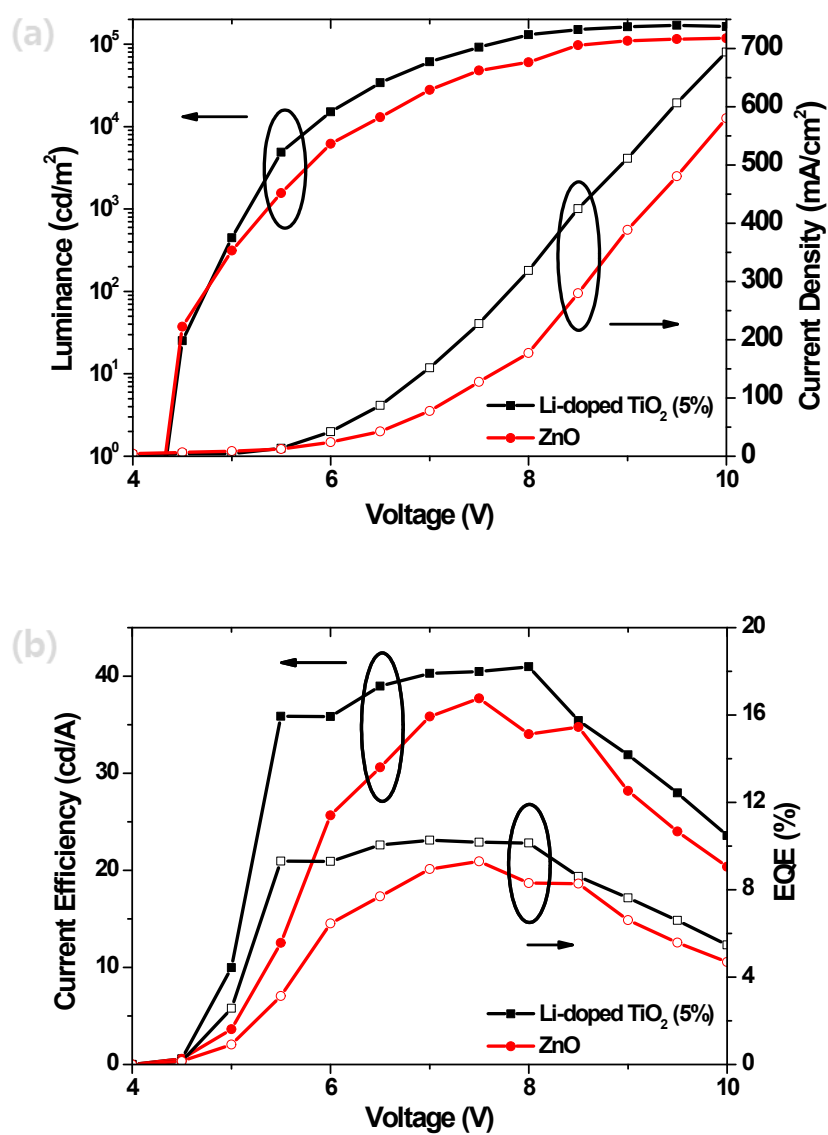

**Fig. S9** Voltage-dependent variations of (a) current density and luminance and (b) current efficiency and EQE of QLEDs with 5% Li-doped TiO<sub>2</sub> NPs or ZnO NPs as the ETL.

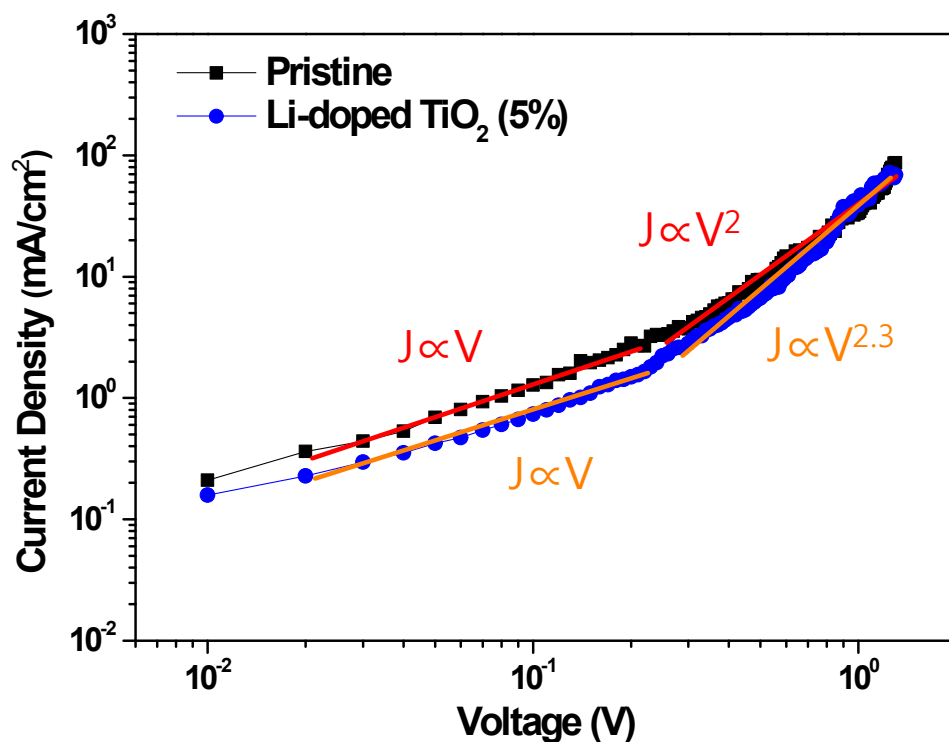

**Fig. S10** Current density-voltage curves of two comparative EODs based on pristine and 5% Li-doped  $\text{TiO}_2$  NPs. EOD structure consists of ITO/Al/200 nm-thick pristine or 5% Li-doped  $\text{TiO}_2$  NPs/Al. Electron mobilities were calculated by Child's law (inset) to be  $3.3 \times 10^{-6}$  and  $2.8 \times 10^{-6} \text{ cm}^2/\text{Vs}$  for pristine or 5% Li-doped  $\text{TiO}_2$  NPs, respectively. Relative permittivity of  $\text{TiO}_2$  was taken as 85 for this calculation.

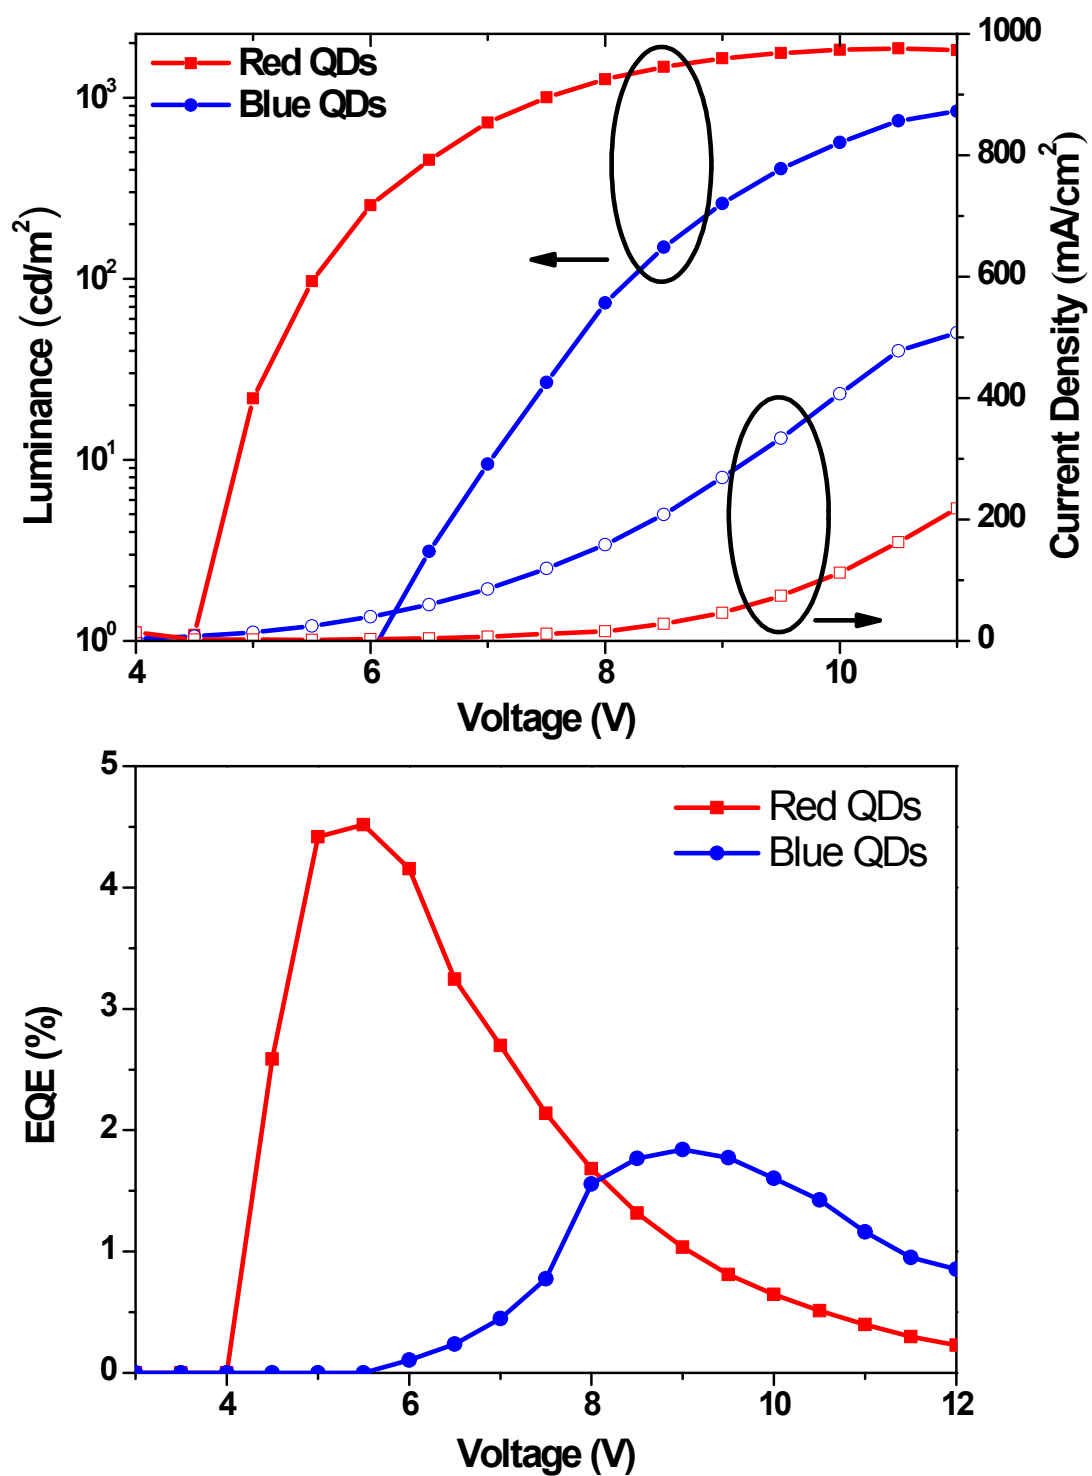

**Fig. S11** (a) Luminance-voltage-current density curves and (b) EQE-voltage curves of red and blue QLEDs with 5% Li-doped TiO<sub>2</sub> NPs.
